# Supplementary material for: Porous CaMnO3-promoted g-C3N4 as an effective photocatalyst for tetracycline degradation
Source: Royal Society of Chemistry journal article supplement (doi:10.1039/d4ra06407k), 2024-01-01
Supplement: d4ra06407k1.pdf [file d4ra06407k1.pdf]

## Supporting Information

### **Porous CaMnO<sub>3</sub>-promoted g-C<sub>3</sub>N<sub>4</sub> as an effective photocatalyst for Tetracycline degradation**

Bo Zhang<sup>a</sup>, Chaoqi Li<sup>a</sup>, Shasha Liu<sup>a</sup>, Lixuan Zhuang<sup>a</sup>, Weiqi Zhang<sup>a</sup>, Limei Huang<sup>a</sup>,  
Zhenzhen Jia<sup>c</sup>, Dongdong Chen<sup>a, \*</sup>, Xiang Li<sup>a, \*</sup>

<sup>a</sup> School of Environmental and Chemical Engineering, Guangdong Provincial Key  
Laboratory of Environmental Health and Land Resource, Zhaoqing University,  
526061 Zhaoqing, China

<sup>b</sup> School of Environmental Science and Engineering, Sun Yat-Sen University, 510006  
Guangzhou, China

\* Corresponding authors. [chendongdong@zqu.edu.cn](mailto:chendongdong@zqu.edu.cn);

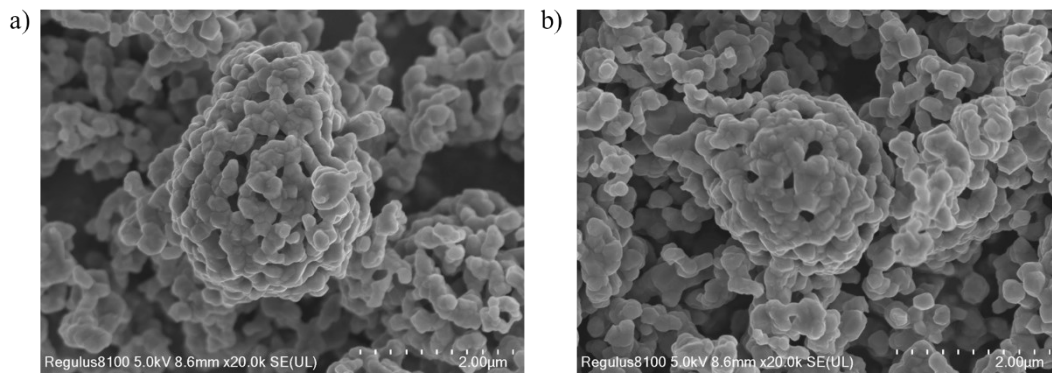

**Figure S1.** Representative SEM images for the as-prepared  $\text{CaMnO}_3$  sample.

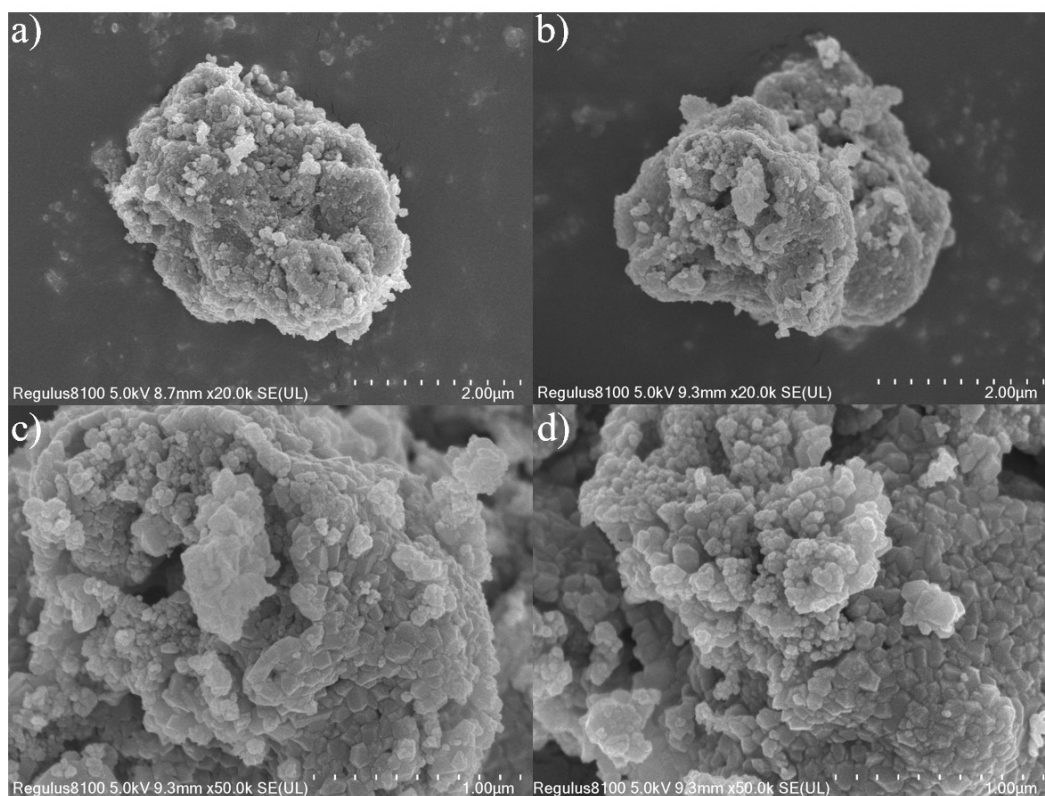

**Figure S2.** Representative SEM images for the as-prepared  $\text{CaMnO}_3/\text{g-C}_3\text{N}_4$  sample, 2 μm for a) and b); 1 μm for c) and d).

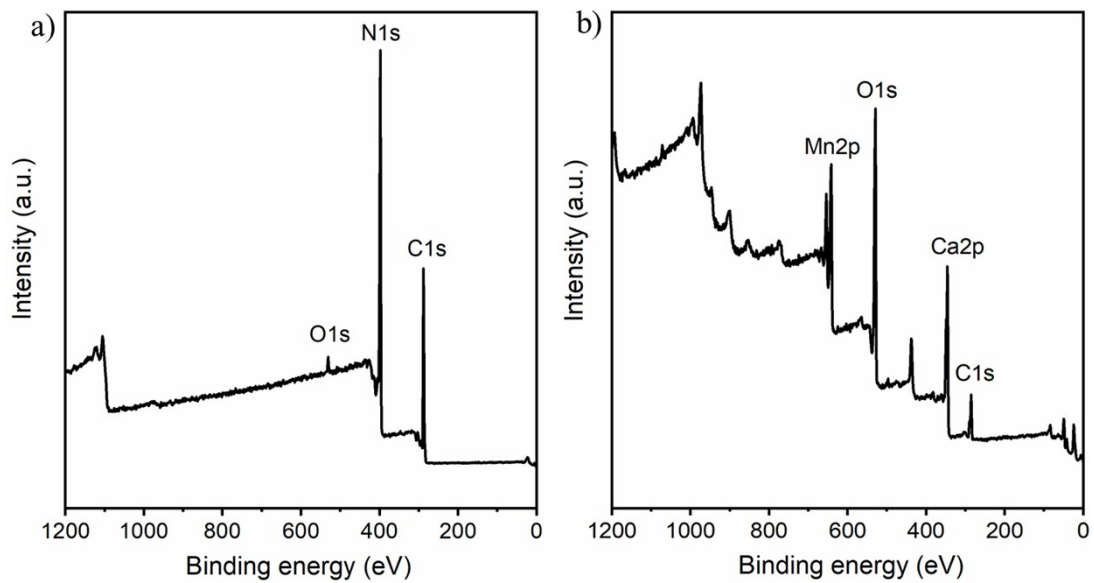

**Figure S3.** XPS survey spectrum of the g-C<sub>3</sub>N<sub>4</sub> (a) and CaMnO<sub>3</sub> (b) photocatalyst.

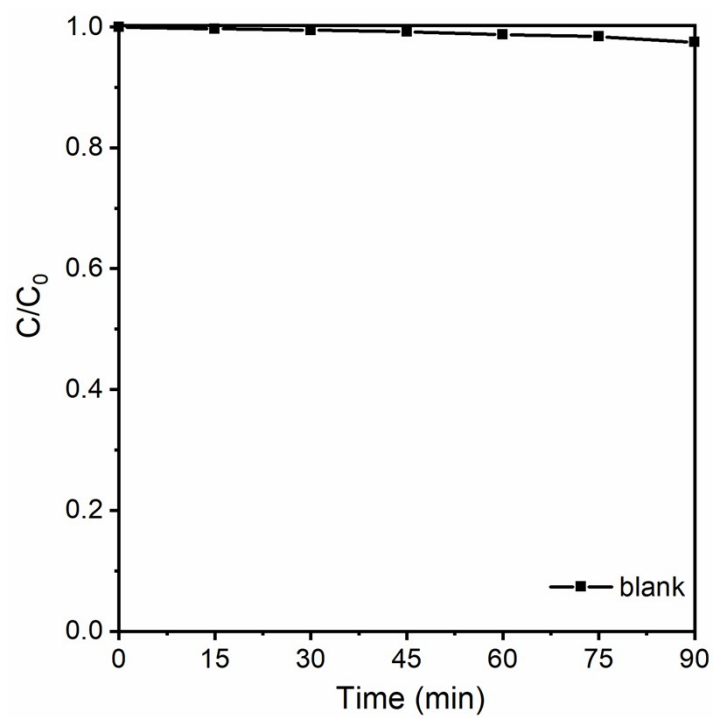

**Figure S4.** Photocatalytic performance in the absence of catalyst for TC degradation under the irradiation of visible light.

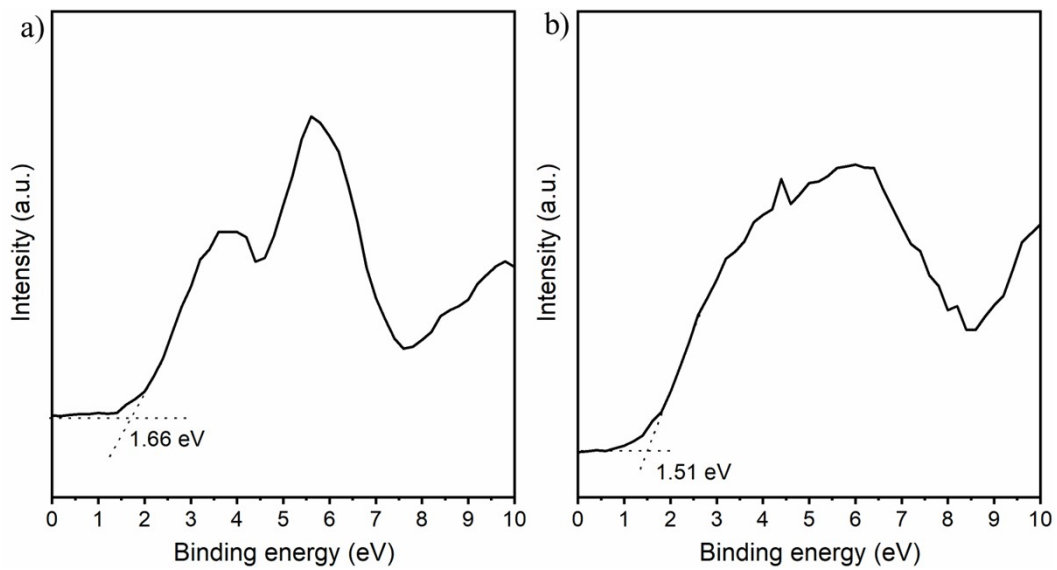

**Figure S5.** VB-XPS patterns of a) the pristine g-C<sub>3</sub>N<sub>4</sub> and b) CaMnO<sub>3</sub>/g-C<sub>3</sub>N<sub>4</sub> photocatalyst.

**Table S1** The specific surface areas, pore volumes, and pore sizes of fabricated g-C<sub>3</sub>N<sub>4</sub>,

CaMnO<sub>3</sub> and CaMnO<sub>3</sub>/g-C<sub>3</sub>N<sub>4</sub> photocatalyst

| Sample                                              | Surface area<br>(m <sup>2</sup> g <sup>-1</sup> ) | Pore size<br>(nm) | Pore volume<br>(cm <sup>3</sup> g <sup>-1</sup> ) |
|-----------------------------------------------------|---------------------------------------------------|-------------------|---------------------------------------------------|
| CaMnO <sub>3</sub>                                  | 4.07                                              | 8.06              | 0.008                                             |
| g-C <sub>3</sub> N <sub>4</sub>                     | 23.07                                             | 23.19             | 0.134                                             |
| CaMnO <sub>3</sub> /g-C <sub>3</sub> N <sub>4</sub> | 25.72                                             | 16.29             | 0.105                                             |

**Table S2** Comparison of the photocatalytic performance of  $\text{CaMnO}_3/\text{g-C}_3\text{N}_4$  with other reported photocatalysts

| Material                                                   | catalyst dosage (mg) | TC solution (mg/L) | Degradation | Light irradiation | Ref.      |
|------------------------------------------------------------|----------------------|--------------------|-------------|-------------------|-----------|
| $\text{g-C}_3\text{N}_4/\text{BiVO}_4$                     | 50                   | 10                 | 90%         | 180 min           | 1         |
| $\gamma\text{-Fe}_2\text{O}_3/\text{g-C}_3\text{N}_4$      | 50                   | 10                 | 73.8%       | 120 min           | 2         |
| $\text{MoO}_3/\text{g-C}_3\text{N}_4$                      | 50                   | 10                 | 85.9%       | 100 min           | 3         |
| $\text{g-C}_3\text{N}_4/\text{WO}_3$                       | 40                   | 10                 | 79.8%       | 180 min           | 4         |
| $\text{WO}_3/\text{g-C}_3\text{N}_4/\text{Bi}_2\text{O}_3$ | 100                  | 10                 | 80.2%       | 60 min            | 5         |
| $\text{CuBi}_2\text{O}_4/\text{g-C}_3\text{N}_4$           | 50                   | 10                 | 83%         | 60 min            | 6         |
| $\text{CuInS}_2/\text{g-C}_3\text{N}_4$                    | 50                   | 20                 | 83.7%       | 60 min            | 7         |
| $\text{Bi}_2\text{O}_3$ QDs/ $\text{g-C}_3\text{N}_4$      | 50                   | 10                 | 72.9%       | 120 min           | 8         |
| $\alpha\text{-MnO}_2/\text{B@}\text{g-C}_3\text{N}_4$      | 50                   | 10                 | 87%         | 80 min            | 9         |
| B- $\text{TiO}_2$                                          | 20                   | 10                 | 66.2%       | 240 min           | 10        |
| P25                                                        | 50                   | 20                 | 54%         | 60 min            | 11        |
| $\text{SrTiO}_3/\text{TiO}_2$                              | 20                   | 30                 | 98.2%       | 120 min           | 12        |
| $\text{TiO}_2/\text{BiOCl}$                                | 50                   | 20                 | 86.9%       | 100 min           | 13        |
| Ce- $\text{TiO}_2$                                         | 10                   | 20                 | 77.7%       | 110 min           | 14        |
| $\text{CaMnO}_3/\text{g-C}_3\text{N}_4$                    | 50                   | 10                 | 95%         | 90 min            | This work |



## References

- 1 G. Zhou, L. Meng, X. Ning, W. Yin, J. Hou, Q. Xu, J. Yi, S. Wang and X. Wang, *Int. J. Hydrogen Energ.*, 2022, **47**, 8749-8760.
- 2 C. Li, S. Yu, H. Che, X. Zhang, J. Han, Y. Mao, Y. Wang, C. Liu and H. Dong, *ACS Sustain. Chem. Eng.*, 2018, **6**, 16437-16447.
- 3 L. Liu, J. Huang, H. Yu, J. Wan, L. Liu, K. Yi, W. Zhang and C. Zhang, *Chemosphere*, 2021, **282**, 131049.
- 4 H. Jing, R. Ou, H. Yu, Y. Zhao, Y. Lu, M. Huo, H. Huo and X. Wang, *Sep. Purif. Technol.*, 2021, **255**, 117646.
- 5 L. Jiang, X. Yuan, G. Zeng, J. Liang, X. Chen, H. Yu, H. Wang, Z. Wu, J. Zhang and T. Xiong, *Appl. Catal. B-Environ.*, 2018, **227**, 376-385.
- 6 F. Guo, W. Shi, H. Wang, H. Huang, Y. Liu and Z. Kang, *Inorg. Chem. Front.*, 2017, **4**, 1714-1720.
- 7 F. Guo, W. Shi, M. Li, Y. Shi and H. Wen, *Sep. Purif. Technol.*, 2019, **210**, 608-615.
- 8 Y. Liang, W. Xu, J. Fang, Z. Liu, D. Chen, T. Pan, Y. Yu and Z. Fang, *Appl. Catal. B-Environ.*, 2021, **295**, 120279.
- 9 D. E. Christy, E. Vijayakumar, A. J. Bosco and P. M. Johnson, *Opt. Mater.*, 2023, **136**, 113429.
- 10 S. Wu, X. Li, Y. Tian, Y. Lin and Y. H. Hu, *Chem. Eng. J.*, 2021, **406**, 126747.
- 11 P. Lian, A. Qin, Z. Liu, H. Ma, L. Liao, K. Zhang and N. Li, *Nanomaterials*, 2024, **14**, 943.
- 12 M. Hu, W. Chen and J. Wang, *Water*, 2024, **16**, 210.
- 13 X. Zou, C. Li, L. Wang, W. Wang, J. Bian, H. Bai and X. Meng, *Appl. Surf. Sci.*, 2023, **630**, 157532.
- 14 W. Mei, H. Lu, R. Dong, S. Tang and J. Xu, *ACS Appl. Nano Mater.*, 2024, **7**, 1825-1834.
